# Supplementary material for: Fluorescent Nanocomposite Hydrogels Based on Conjugated Polymer Nanoparticles as Platforms for Alkaline Phosphatase Detection
Source: MDPI journal article supplement (doi:10.3390/bios13030408), 2023-03-21
Supplement: s1 [file s1]

# Fluorescent Nanocomposite Hydrogels Based on Conjugated Polymer Nanoparticles as Platforms for Alkaline Phosphatase Detection

Yolanda Alacid <sup>1,2</sup>, Rocío Esquembre <sup>1</sup>, Francisco Montilla <sup>2</sup>, María José Martínez-Tomé <sup>1,\*</sup> and C. Reyes Mateo <sup>1,\*</sup>

<sup>1</sup> Instituto de Investigación, Desarrollo e Innovación en Biotecnología Sanitaria de Elche (IDiBE), Universidad Miguel Hernández, Avenida de la Universidad s/n, 03202, Elche, Alicante, Spain

<sup>2</sup> Departamento de Química Física and Instituto Universitario de Materiales de Alicante (IUMA), Universidad de Alicante, Carretera San Vicente s/n, 03690, Alicante, Spain

\* Correspondence: mj.martinez@umh.es (M.J.M.T), rmateo@umh.es (C.R.M)

**Keywords:** Nanocomposite hydrogel; polyfluorene; fluorescent sensor; alkaline phosphatase; immobilization; portable device;

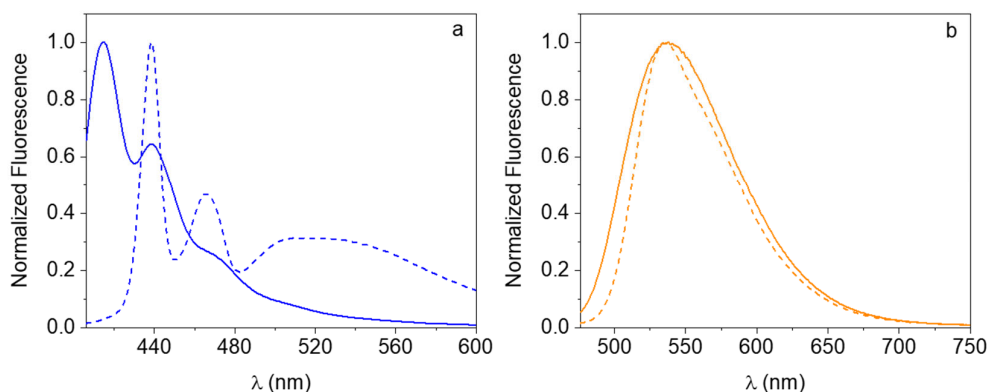

**Figure S1.** Normalized fluorescence emission spectra of PFO (a) and F8BT (b) NPs in chloroform (solid line) and TRIS buffer (dash line).

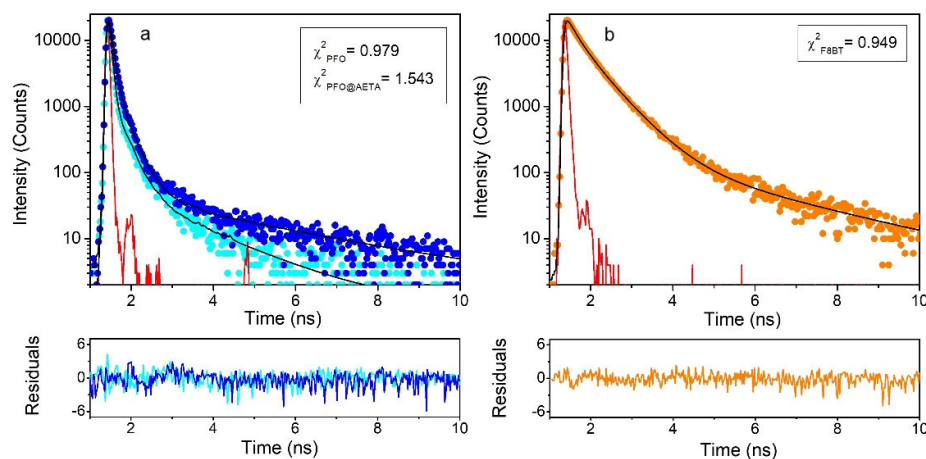

**Figure S2.** Semi-log plot of fluorescence decays recorded at 20°C for (a) FPO (cyan) and FPO@AETA (blue), and (b) F8BT (orange). The fitting curves are presented in black and the instrumental

response function measured with a LUDOX colloidal solution in red. The value of  $\chi^2$  and weighted residuals (lower panels), both used to assess the quality of the fits, are also shown.

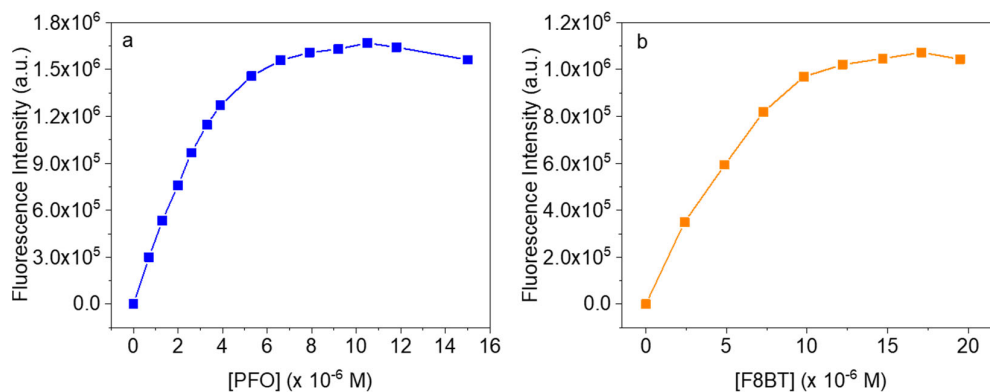

**Figure S3.** Influence of increasing concentrations of PFO\_CNPs (a) and F8BT\_CNPs (b) on the maximum fluorescence intensity to a buffered solution.

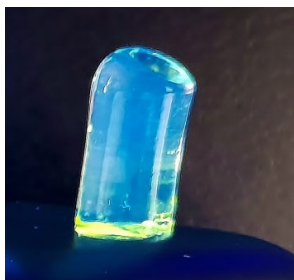

**Figure S4.** Digital image of ex situ F8BT@AETA hydrogel taken under irradiation with UV light (365 nm) after three days of preparation.

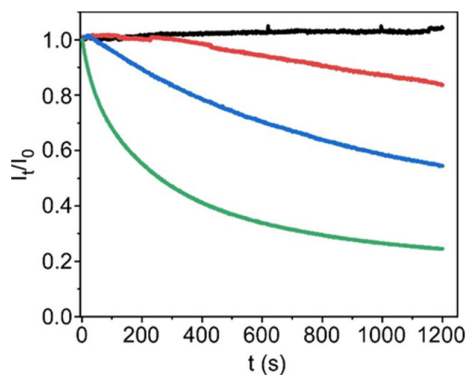

**Figure S5.** Fluorescence quenching kinetics ( $I/I_0$ ) measured in PNPP@PFO@AETA hydrogels during their immersion in solutions containing concentrations of 0 (black), 0.01 (red), 0.1 (blue) and 3 (green)  $\mu$ M ALP.
